# Supplementary material for: Dissociable control of unconditioned responses and associative fear learning by parabrachial CGRP neurons
Source: eLife journal article supplement (doi:10.7554/elife.59799), 2020-08-28
Supplement: supp [file elife_poa_e59799_Figure_1_figure_supplement_2.docx]

| Abbreviation | Full name | Subnuclei or subregions |
| --- | --- | --- |
| act | Anterior commissure, temporal limb |  |
| BNST | Bed nucleus of stria terminalis | Oval (ovBNST) |
| cCeA | Caudal central amygdala | Lateral and capsular (CeAl, CeAc) |
| CGRP | Calcitonin gene-related peptide |  |
| cpd | Cerebral peduncle |  |
| IC | Insular cortex | Visceral and gustatory (VISC, GU) |
| int | Internal capsule |  |
| PBN | Parabrachial nucleus | External lateral, medial, waist (PBel, PBm, PBw) |
| PSTN | Parasubthalamic nucleus |  |
| rCeA | Rostral CeA | Capsular (rCeAc) |
| SI | Substantia innominata |  |
| st | Stria terminalis |  |
| vl | Lateral ventricle |  |
| VM | Ventromedial thalamus |  |
| VPMpc | Ventroposterior medial thalamus, parvicellular part |  |
