# Supplementary material for: Dissociable control of unconditioned responses and associative fear learning by parabrachial CGRP neurons
Source: eLife. 2020 Aug 28;9:e59799. doi: 10.7554/eLife.59799 (PMC7556873; doi:10.7554/eLife.59799)
Supplement: Supplementary file 1. [file elife-59799-supp1.xlsx]

## Sheet: Sheet1
Exact P values are provided for those > 0.0001, except for some post-hoc analyses. All t tests are two sided.
Figure 1
Panel	Fiber site	Test	ChR2	YFP	Test	T/F	95% CI	P value	Interaction		Time		Column		Posttest
B	PBN	Freezing	8	6	2-way RM ANOVA				F (10, 120) = 83.53	P<0.0001	F (3.592, 43.10) = 96.77	P<0.0001	F (1, 12) = 96.68	P<0.0001	Sidak
					Sidak	Row 3	60.74 to 101.4	<0.0001
					Sidak	Row 6	77.89 to 99.28	<0.0001
					Sidak	Row 9	75.56 to 99.65	<0.0001
C	PBN	Auditory fear conditioning	4	4	Ordinary 2-way ANOVA				F (5, 36) = 5.618	P=0.0006	F (5, 36) = 7.708	P<0.0001	F (1, 36) = 113.2	P<0.0001	Sidak
					Sidak	CS 2	6.388 to 50.14	**
						CS 3	14.80 to 58.55	***
						CS 4	17.23 to 60.97	****
						CS 5	14.74 to 58.49	***
						CS 6	38.96 to 82.71	****
		Probe	4	4	Unpaired t test Welch	t=4.453, df=3.465	9.349 to 46.20	0.0155
E	PBN	Heart rate	5	5	Ordinary 1-way ANOVA	F (2, 12) = 39.66		<0.0001
					Dunnett's	Pre vs. On	-229.6 to -90.02	0.0002
						On vs. Post	-314.3 to -174.7	<0.0001
F	PBN	Respiration	6		Ordinary 1-way ANOVA	F (2, 15) = 5.166		0.0196
					Dunnett's	On vs. Post	-76.86 to -10.53	0.0108
G	PBN	Anxiety	4	4	Unpaired t test Welch	t=3.777, df=5.925	-25.94 to -5.505	0.0094
K	VPMpc	EPSC amplitude	5 ea		Ordinary Ordinary 1-way ANOVA	F (5, 24) = 38.75		<0.0001
	PSTN				Tukey's MC test	rCeA vs. VPMpc	-342.3 to -181.9	<0.0001
	cCeA					cCeA vs. VPMpc	-314.8 to -154.4	<0.0001
	rCeA					SI vs. VPMpc	-376.5 to -216.0	<0.0001
	SI					BNST vs. VPMpc	-376.6 to -216.2	<0.0001
	ovBST					VPMpc vs. PSTN	199.7 to 360.2	<0.0001
Figure 3
Panel	Fiber site	Test	ChR2	YFP	Test	T/F/Comparison	95% CI	P value	Interaction		Time		Column		Posttest
A	VPMpc	Freezing	8	5	2-way RM ANOVA				F (10, 110) = 8.123	P<0.0001	F (10, 110) = 12.27	P<0.0001	F (1, 11) = 28.71	P=0.0002	Sidak
					Sidak	Row 3	19.08 to 47.11	****
						Row 6	21.18 to 49.20	****
						Row 9	11.74 to 39.76	****
B	PST		6	5	2-way RM ANOVA				F (10, 90) = 4.798	P<0.0001	F (10, 90) = 7.494	P<0.0001	F (1, 9) = 5.224	P=0.0481	Sidak
					Sidak	Row 3	8.869 to 40.40	***
						Row 9	11.70 to 43.23	****
C	cCeA		6	5	2-way RM ANOVA				F (10, 110) = 6.320	P<0.0001	F (10, 110) = 6.442	P<0.0001	F (1, 110) = 58.88	P<0.0001	Sidak
					Sidak	Row 3	8.155 to 20.82	****
						Row 6	5.217 to 17.88	****
						Row 9	6.302 to 18.97	****
D	rCeA		6	5	2-way RM ANOVA				F (10, 90) = 1.357	P=0.2133	F (10, 90) = 1.670	P=0.1001	F (1, 9) = 4.560	P=0.0615
E	SI		8	6	2-way RM ANOVA				F (10, 120) = 3.452	P=0.0005	F (10, 120) = 4.553	P<0.0001	F (1, 12) = 28.15	P=0.0002	Bonferonni
					Bonferonni	Row 3	-32.84 to -9.769	****
						Row 6	-28.28 to -5.204	***
						Row 9	-27.31 to -4.236	**
						Row 11	-25.84 to -2.765	**
F	ovBST		9	5	2-way RM ANOVA				F (10, 132) = 1.620	P=0.1076	F (10, 132) = 3.743	P=0.0002	F (1, 132) = 22.84	P<0.0001	Sidak
					Sidak	Row 6	3.240 to 25.17	**
						Row 9	1.269 to 23.20	*
G	VPMpc	Heart rate	8		Ordinary 1-way ANOVA	F (2, 21) = 0.5252		0.599
H	PST		5		Ordinary 1-way ANOVA	F (2, 12) = 6.395		0.0129
					Dunnett's	Pre vs. On	-138.6 to -21.18	0.0097
						Pre vs Post	-120.9 to -3.439	0.0384
I	cCeA		6		Ordinary 1-way ANOVA	F (2, 15) = 1.812		0.1973
J	rCeA		6		Ordinary 1-way ANOVA	F (2, 15) = 10.89		0.0012
					Dunnett's	Pre vs On	-267.9 to -76.71	0.001
						Pre vs Post	-234.8 to -43.63	0.0055
K	SI		5		Ordinary 1-way ANOVA	F (2, 12) = 4.086		0.0443
					Dunnett's	Pre vs On	-232.1 to -4.544	0.0418
L	ovBST		6		Ordinary 1-way ANOVA	F (2, 15) = 5.596		0.0153
					Dunnett's	Pre vs On	-187.8 to -21.27	0.0147
						Pre vs Post	-175.4 to -8.806	0.0303
M	VPMpc	Respiration	8		Ordinary 1-way ANOVA	F (2, 21) = 0.5109		0.6073
N	PST		5		Ordinary 1-way ANOVA	F (2, 12) = 0.08268		0.9212
O	cCeA		6		Ordinary 1-way ANOVA	F (2, 15) = 2.154		0.1505
P	rCeA		6		Ordinary 1-way ANOVA	F (2, 15) = 5.476		0.0164
					Dunnett's	Pre vs On	-75.97 to -5.624	0.0234
						Pre vs Post	-77.01 to -6.659	0.0203
Q	SI		5		Ordinary 1-way ANOVA	F (2, 12) = 0.1802		0.8373
R	ovBST		6		Ordinary 1-way ANOVA	F (2, 15) = 3.799		0.0463
					Dunnett's	Pre vs On	-79.24 to -3.774	0.0312
S	VPMpc	TSkT	8	5	Unpaired t test Welch	t=0.3672, df=10.59	-1.318 to 1.843	0.7207
T	PST		5	5		t=2.630, df=7.958	0.2864 to 4.394	0.0303
U	cCeA		6	5		t=0.03110, df=6.861	-2.009 to 2.062	0.9761
V	rCeA		6	5		t=2.587, df=8.505	0.1872 to 2.993	0.0307
W	SI		5	5		t=4.761, df=7.954	1.144 to 3.296	0.0014
X	ovBST		6	4		t=0.6994, df=7.741	-1.660 to 3.093	0.5048
Figure 4
Panel	Fiber site	Test	ChR2	YFP	Test	T/F	95% CI	P value
B	PBN	Open arm Time	4	4	Unpaired t test Welch	t=3.777, df=5.925	-25.94 to -5.505	0.0094
	VPMpc		7	5		t=1.365, df=8.267	-26.93 to 6.830	0.2082
	PSTN		9	5		t=0.1192, df=5.493	-36.00 to 32.72	0.9094
	cCeA		7	5		t=0.5533, df=6.780	-18.31 to 29.40	0.5978
	rCeA		7	5		t=2.592, df=9.424	2.550 to 35.75	0.0281
	SI		10	6		t=0.06026, df=7.956	-16.88 to 16.02	0.9534
	ovBST		9	6		t=2.890, df=8.854	-29.51 to -3.561	0.0182
C	PBN	Frequency	4	4		t=4.867, df=6.899	-1.164 to -0.4013	0.0019
	VPMpc		7	5		t=0.3377, df=10.42	-0.6419 to 0.4721	0.7423
	PSTN		9	5		t=1.752, df=5.478	-1.300 to 0.2296	0.1349
	cCeA		7	5		t=1.690, df=9.235	-0.1660 to 1.161	0.1245
	rCeA		7	5		t=2.510, df=5.588	0.009805 to 2.633	0.0488
	SI		10	6		t=1.038, df=13.73	-0.2275 to 0.6527	0.3172
	ovBST		9	6		t=2.650, df=6.873	-1.427 to -0.07853	0.0335
E	PBN	RTPP	6	4		t=6.265, df=6.314	-36.15 to -16.02	***
F	VPMpc	RTPP	7	5		t=4.276, df=8.747	-29.09 to -8.900	0.0022
G	PST	RTPP	9	5		t=4.109, df=9.714	-22.26 to -6.566	0.0022
H	cCeA	RTPP	6	5		t=1.004, df=8.994	-21.63 to 8.336	0.3418
I	rCeA	RTPP	7	5		t=3.377, df=5.915	-18.39 to -2.905	0.0152
J	SI	RTPP	6	5		t=3.019, df=7.868	-26.57 to -3.521	0.0169
K	ovBST	RTPP	7	5		t=0.3481, df=9.988	-7.028 to 5.129	0.735
Figure 5
Panel	Fiber site	Test	ChR2	YFP	Test	T/F	95% CI	P value	Interaction		Time		Column		Posttest
B	VPMpc	AFC	8	5	Ordinary 2-way ANOVA				F (5, 66) = 5.281	P=0.0004	F (5, 66) = 5.719	P=0.0002	F (1, 66) = 115.4	P<0.0001	Sidak's
					Sidak	CS 2	3.269 to 27.53	**
						CS 3	6.804 to 31.06	***
						CS 4	13.88 to 38.14	****
						CS 5	16.14 to 40.40	****
						CS 6	15.48 to 39.74	****
		Probe	8	5	Unpaired t test Welch	t=7.286, df=8.933	14.68 to 27.92	<0.0001
C	PST	AFC	5	4	Ordinary 2-way ANOVA				F (5, 42) = 1.656	P=0.1665	F (5, 42) = 3.492	P=0.0099	F (1, 42) = 6.985	P=0.0115	Sidak's
					Sidak	CS 6	4.367 to 36.06	**
		Probe	5	4	Unpaired t test Welch	t=1.712, df=5.367	-3.420 to 17.93	0.1436
D	cCeA	AFC	7	5	Ordinary 2-way ANOVA				F (5, 60) = 0.5469	P=0.7400	F (5, 60) = 1.640	P=0.1633	F (1, 60) = 4.693	P=0.0343	Sidak's
		Probe	7	5	Unpaired t test Welch	t=4.398, df=8.152	5.934 to 18.93	0.0022
E	rCeA	AFC	8	5	Ordinary 2-way ANOVA				F (5, 60) = 0.9563	P=0.4518	F (5, 60) = 2.074	P=0.0812	F (1, 60) = 2.738	P=0.1032
		Probe	8	5	Unpaired t test Welch	t=0.8981, df=9.790	-2.700 to 6.329	0.3907
F	SI	AFC	8	6	Ordinary 2-way ANOVA				F (5, 60) = 5.789	P=0.0002	F (5, 60) = 10.31	P<0.0001	F (1, 12) = 23.45	P=0.0004	Sidak's
					Sidak's	CS 4	-28.85 to -1.612	*
						CS 5	-32.74 to -5.503	**
						CS 6	-45.12 to -17.88	****
		Probe	8	6	Unpaired t test Welch	t=3.861, df=11.15	6.069 to 22.10	0.0026
G	ovBST	AUC	5	4	Ordinary 2-way ANOVA				F (5, 66) = 0.3037	P=0.9090	F (5, 66) = 2.087	P=0.0780	F (1, 66) = 2.764	P=0.1011
		Probe	5	4	Unpaired t test Welch	t=0.8007, df=5.684	-8.396 to 16.40	0.4555
H	All	AUC	PBN 8, VPMpc 8, PST 5, cCeA 7, rCeA 8, SI 8, ovBST 5	7	Ordinary 1-way ANOVA	F (7, 40) = 19.44		<0.0001
					Tukey's MC test	YFP vs. PBN	-208.5 to -103.3	****
						YFP vs. VPMpc	-135.4 to -49.45	****
						YFP vs. SI	-113.1 to -20.30	**
						PBN vs. VPMpc	10.85 to 116.1	**
						PBN vs. PSTN	54.55 to 169.8	****
						PBN vs. cCeA	74.89 to 185.8	****
						PBN vs. rCeA	84.88 to 192.6	****
						PBN vs. SI	33.72 to 144.6	***
						PBN vs. ovBNST	84.63 to 206.1	****
						VPMpc vs. cCeA	20.49 to 113.3	***
						VPMpc vs. rCeA	30.80 to 119.7	****
						VPMpc vs. ovBNST	29.31 to 134.5	***
						rCeA vs. SI	-97.34 to -1.762	*
						SI vs. ovBNST	0.7524 to 111.6	*
Figure 6
Panel	Fiber site	Test	ChR2	YFP	Test	T/F	95% CI	P value	Interaction		Time		Column		Posttest
B (left)	cCeA	Freezing	4		Ordinary 1-way ANOVA	F (4, 15) = 18.08		<0.0001
					Tukey's	0 vs. 10	-21.38 to -0.6981	*
						0 vs. 20	-30.38 to -9.698	***
						0 vs. 30	-31.06 to -10.39	***
						0 vs. 40	-35.70 to -15.02	****
						10 vs. 40	-11.03 to 9.652	**
B (middle)	SI	Freezing	4		Ordinary 1-way ANOVA	F (4, 15) = 19.21		<0.0001
					Tukey's	0 vs. 10	-28.63 to -8.098	***
						0 vs. 20	-33.98 to -13.45	****
						0 vs. 30	-30.99 to -10.46	***
						0 vs. 40	-36.05 to -15.52	****
B (right)	VPMpc	Freezing	4		Ordinary 1-way ANOVA	F (4, 15) = 12.09		0.0001
					Tukey's	0 vs. 20	-28.63 to -8.098	**
						0 vs. 30	-33.98 to -13.45	***
						0 vs. 40	-30.99 to -10.46	****
						10 vs. 40	-36.05 to -15.52	*
C	VPMpc+SI	AFC	4		Ordinary 2-way ANOVA				F (5, 30) = 3.401	P=0.0149	F (5, 30) = 5.119	P=0.0016	F (1, 6) = 21.57	P=0.0035	Sidak
					Sidak	CS 3	6.646 to 47.60	**
						CS 5	4.871 to 45.83	**
						CS 6	17.60 to 58.55	****
C		Probe	4	4	Unpaired t test Welch	t=4.904, df=3.414	9.578 to 39.12	0.0119
C (right)		AUC	PBN 4, VPmpc 8, SI 8, VPMpc + SI 4	8	Ordinary 1-way ANOVA	F (4, 27) = 19.73		<0.0001
					Tukey's	YFP vs. PBN	-211.4 to -100.3	<0.0001
						YFP vs. VPMpc	-137.8 to -47.01	<0.0001
						YFP vs. SI	-115.0 to -24.22	0.0011
						YFP vs. VPMpc+SI	-156.2 to -45.04	0.0001
						PBN vs. VPMpc	7.865 to 119.0	0.0194
						PBN vs. SI	30.66 to 141.8	0.0009
D	cCeA+SI	Freezing	4	4	2-way RM ANOVA				F (13, 78) = 12.33	P<0.0001	F (13, 78) = 17.41	P<0.0001	F (1, 6) = 213.5	P<0.0001	Sidak
					Sidak	Row 3	20.54 to 37.54	****
						Row 5	1.433 to 18.43	*
						Row 6	15.69 to 32.69	****
						Row 7	3.208 to 20.21	**
						Row 9	21.33 to 38.32	****
						Row 10	2.018 to 19.02	**
						Row 12	19.38 to 36.37	****
						Row 13	4.768 to 21.77	***
						Row 14	4.658 to 21.66	***
E	cCeA+VPMpc	Freezing	4	4	2-way RM ANOVA				F (13, 84) = 30.47	P<0.0001	F (13, 84) = 31.28	P<0.0001	F (1, 84) = 631.5	P<0.0001	Sidak
					Sidak	Row 3	52.75 to 79.50	****
						Row 5	3.073 to 29.83	**
						Row 6	49.02 to 75.78	****
						Row 7	4.730 to 31.49	**
						Row 8	5.863 to 32.62	***
						Row 9	58.76 to 85.52	****
						Row 10	9.413 to 36.17	****
						Row 11	4.060 to 30.82	**
						Row 12	50.93 to 77.69	****
						Row 13	6.808 to 33.57	***
						Row 14	11.04 to 37.79	****
F	Multi	Freezing	4		Ordinary 1-way ANOVA	F (2, 9) = 218.9	P<0.0001
					Tukey's	BL vs. cCeASI	-35.20 to -17.76	****
						BL vs. cCeAVPMpc	-73.70 to -56.26	****
						cCeASI vs. cCeAVPMpc	-47.22 to -29.78	****
F (right)	Multi	Freezing post	4		Ordinary 1-way ANOVA	F (2, 9) = 17.67	P=0.0008
					Tukey's	BL vs. cCeAVPMpc	-25.40 to -9.144	***
						cCeASI vs. cCeAVPMpc	-17.67 to -1.414	*
G	cCeA+VPMpc	Heart rate	5		Ordinary 1-way ANOVA	F (2, 12) = 7.384		0.0081
					Dunnett's	Pre vs. On	51.14 to 266.6	0.0058
Figure 7
Panel	Fiber site	Test	JAWS	YFP	Test	T	95% CI	P value	Interaction		Time		Column		Posttest
B	PBN	AFC	8	5	2-way RM ANOVA				F (5, 55) = 3.501	P=0.0081	F (3.261, 35.87) = 44.35	P<0.0001	F (1, 11) = 21.66	P=0.0007	Sidak
					Sidak	CS 2	-39.78 to -8.333	0.0035
						CS 3	-61.67 to -2.259	0.0337
						CS 4	-56.06 to -7.268	0.011
						CS 6	-58.60 to -13.58	0.0034
B		Probe			Unpaired t test Welch	t=6.448, df=10.88	-50.17 to -24.61	<0.0001
B (right)		Context			Unpaired t test Welch	t=4.429, df=8.928	-27.94 to -9.033	0.0017
D	CeA	Ephys JAWS	6		Paired t test	t=4.835, df=5	-1.203 to -0.3679	0.0047
E	VPMpc	AFC	8	12	2-way RM ANOVA				F (5, 90) = 4.766	P=0.0007	F (3.344, 60.19) = 205.4	P<0.0001	F (1, 18) = 28.78	P<0.0001
					Sidak	CS 2	-25.62 to -10.43	<0.0001
						CS 3	-59.86 to -0.9760	0.042
						CS 6	-29.50 to -1.156	0.0318
E		Probe			Unpaired t test Welch	t=4.581, df=14.41	-53.69 to -19.51	0.0004
E (right)		Context			Unpaired t test Welch	t=1.266, df=11.72	-3.915 to 14.71	0.2301
F	CeA	AFC	8	12	2-way RM ANOVA				F (5, 90) = 4.860	P=0.0006	F (3.585, 64.53) = 474.6	P<0.0001	F (1, 18) = 2.078	P=0.1666
F		Probe			Unpaired t test Welch	t=0.7638, df=16.69	-18.28 to 8.574	0.4557
F (right)	CeA	Context			Unpaired t test Welch	t=2.150, df=17.17	0.1273 to 12.89	0.0461
G	SI	AFC	8	12	2-way RM ANOVA				F (18, 90) = 3.405	P<0.0001	F (3.5, 63.01) = 278.7	P<0.0001	F (1, 18) = 40.52	P<0.0001
					Sidak	CS 2	-23.43 to -7.230	0.0002
						CS 3	-42.30 to -2.896	0.0217
						CS 4	-39.31 to -4.610	0.0111
						CS 5	-37.34 to -11.49	0.0005
G		Probe			Unpaired t test Welch	t=3.699, df=11.06	-54.47 to -13.85	0.0035
G (right)	SI	Context			Unpaired t test Welch	t=0.2420, df=9.831	-13.03 to 10.48	0.8138
H	All	Area under curve			Ordinary 1-way ANOVA	F (4, 45) = 15.35		<0.0001
					Sidak	YFP vs. PBN		<0.0001
						YFP vs. VPMpc		<0.0001
						YFP vs. SI		<0.0001
I	All	Shock locomotion			Ordinary 1-way ANOVA	F (4, 44) = 4.125		0.0063
					Dunnett's	YFP vs. PBN	-0.1490 to 38.38	0.0525
Figure 1--figure supplement 1
Panel	Fiber site	Test	ChR2	YFP	Test	T	95% CI	P value
C	PBN	Freezing latencies	8	8	Paired t test	t=5.681, df=7	1.609 to 3.903	0.0007
D	PBN	Freezing vs Bradyardia	8	6	Mantel-Cox log-rank test	Chi square = 13.13, df=1	1.277 to 15.29	0.0003
E	PBN	15-Hz Heart rate	5		Paired t test	t=4.173, df=4	-239.7 to -48.18	0.014
F	PBN	15-Hz Respiration	5			t=1.091 df=4	-136.3 to 59.40	0.3366
G	PBN	15-Hz Heart rate		5		t=2.019 df=4	-59.41 to 9.381	0.1136
G (right)	PBN	15-Hz Respiration		5		t=0.3928 df=4	-4.806 to 6.391	0.7145
H	PBN	TSkT	6	6	Unpaired t test Welch	t=3.922, df=9.637	1.115 to 4.085	0.0031
Figure 2--figure supplement 1
Panel	Measure	n			Test	T	95% CI	P value
C	Pbel cell count	ovBST	2		Ordinary 1-way ANOVA	F (4, 9) = 31.17		<0.0001
		CeA	3		Dunnett's	All vs. VPMpc-projectors	67.91 to 253.4	0.0021
		VPMpc	3			All vs. PSTN-projectors	50.91 to 236.4	0.0044
		PSTN	3			All vs. ovBST-projectors	261.6 to 469.0	<0.0001
D	PBm cell count	ovBST	2		Ordinary 1-way ANOVA	F (4, 9) = 10.81		0.0017
		CeA	3		Dunnett's	All vs. PSTN-projectors	10.21 to 87.12	0.015
		VPMpc	3			All vs. CeA-projectors	26.55 to 103.5	0.0025
		PSTN	3			All vs. ovBST-projectors	33.18 to 119.2	0.0018
E	PBw cell count	ovBST 2, 3 others			Ordinary 1-way ANOVA	F (4, 9) = 6.052		0.012
					Dunnett's	All vs. ovBST-projectors	11.09 to 56.58	0.0058
Figure 3--figure supplement 2
Panel	Fiber site	Test	ChR2	YFP	Test	T	95% CI	P value	Interaction		Fiber		Treatment		Posttest
A	Multi	Freezing			Ordinary 2-way ANOVA	t=35.82, df=36.92	-90.61 to -80.90	<0.0001	F (6, 253) = 72.39	P<0.0001	F (1, 253) = 374.8	P<0.0001	F (6, 253) = 75.73	P<0.0001	Sidak's MC test
	PBN		24	18	Sidak's MC test	PBN vs YFP	-97.15 to -74.36	****
	VPMpc		24	15		VPMpc vs YFP	-43.37 to -19.32	****
	PST		18	15		PST vs YFP	-34.13 to -8.577	****
	cCeA		21	15		cCeA vs YFP	-23.84 to 0.8704	ns
	rCeA		18	15		rCeA vs YFP	-13.16 to 12.40	ns
	SI		15	15		SI vs YFP	-26.85 to -4.056	***
	ovBST		18	12		ovBST vs YFP	-23.19 to 0.3448	ns
						PBN vs PSTN	50.47 to 73.26	****
						PBN vs cCeA	68.02 to 89.86	****
						PBN vs rCeA	72.73 to 95.52	****
						PBN vs SI	59.75 to 80.85	****
						PBN vs ovBST	64.83 to 85.33	****
						PBN vs VPMpc	45.51 to 66.61	****
						PSTN vs cCeA	5.334 to 28.81	****
						PSTN vs rCeA	10.08 to 34.45	****
						PSTN vs ovBST	2.096 to 24.34	**
						VPMpc vs cCeA	-33.80 to -11.96	****
						SI vs rCeA	-25.22 to -2.433	**
						VPMpc vs rCeA	-39.47 to -16.68	****
						VPMpc vs SI	-24.79 to -3.692	***
						VPMpc vs ovBST	-29.28 to -8.771	****
B	PBN	Locomotion	7	6	Unpaired t test Welch	t=3.375, df=5.907	10.60 to 67.30	0.0153
	VPMpc		8	5		t=1.190, df=6.022	-23.28 to 67.44	0.2788
	PST		6	5		t=0.9086, df=8.856	-22.89 to 9.795	0.3876
	cCeA		6	5		t=0.6800, df=8.076	-57.54 to 31.30	0.5155
	rCeA		6	5		t=1.882, df=6.298	-78.67 to 9.832	0.1066
	SI		5	5		t=0.08392, df=7.540	-40.16 to 43.16	0.9353
	ovBST		6	4		t=0.8561, df=3.448	-32.77 to 59.42	0.4473
C	Multi	Latency during	same above	35	Mantel-Cox logrank test	Chi-squared = 168.1		< 0.0001
C (right)		Latency Post	same above	35		Chi-squared = 79.79		< 0.0001
D (left)	Latency during photostimulation	YFP	35		Ordinary 1-way ANOVA	F (7, 78) = 9.002		< 0.0001
		PBN	8		Tukey's	YFP vs. PBN	4.339 to 12.47	****
		VPMpc	8			YFP vs. VPMpc	0.5579 to 8.693	*
		PSTN	6			YFP vs. PSTN	0.9225 to 10.10	**
		cCeA	7			YFP vs. SI	0.6217 to 8.757	*
		rCeA	6			YFP vs. ovBNST	0.1904 to 8.325	*
		SI	8			PBN vs. cCeA	-11.43 to -0.6865	*
		ovBNST	8			PBN vs. rCeA	-14.37 to -3.159	***
D (right)	Latency during photostimulation	YFP	35		Ordinary 1-way ANOVA	F (7, 78) = 8.734		< 0.0001
		PBN	8		Tukey's	YFP vs. PBN	2.682 to 10.68	****
		VPMpc	8			YFP vs. PSTN	1.992 to 11.01	***
		PSTN	6			YFP vs. rCeA	3.025 to 12.04	****
		cCeA	7			YFP vs. SI	0.4254 to 8.423	*
		rCeA	6			YFP vs. ovBNST	0.4067 to 8.405	*
		SI	8
		ovBNST	8
E	evoked vs. contextual freezing	YFP	33		Ordinary 2-way ANOVA				F (7, 345) = 70.44	P<0.0001	F (1, 345) = 270.0	P<0.0001	F (7, 345) = 116.4	P<0.0001	Sidak's MC test
		PBN	24		Sidak's MC test	PBN on vs off	66.00 to 82.07	****
		VPMpc	24			VPMpc on vs off	19.59 to 35.66	****
		PSTN	18			PSTN on vs off	11.17 to 29.72	****
		cCeA	21			SI on vs off	0.1054 to 18.43	*
		rCeA	18
		SI	15
		ovBNST	18
F	VPMpc	Latency	8		Paired t test	t=1.194, df=7	-1.967 to 5.980	0.2714
	PSTN		6			t=0.04234, df=5	-2.289 to 2.366	0.9679
	cCeA		7			t=0.4322, df=6	-3.130 to 4.472	0.6807
	rCeA		6			t=4.406, df=5	-10.86 to -2.859	0.007
	SI		8			t=1.078, df=7	-1.545 to 4.135	0.3167
	ovBNST		8			t=0.7515, df=7	-1.894 to 3.659	0.4768
G	Multi	Stim-Fos	3 ea.	6	Ordinary 1-way ANOVA	F (6, 17) = 0.3707		0.8875
	YFP, VPMpc, PSTN, cCeA, rCeA, SI, ovBST
Figure 3--figure supplement 3
Panel	Measure	n			Test	T	95% CI	P value
A	VPMpc	15-Hz Heart rate	8		Paired t test	t=1.469, df=7	-19.14 to 81.94	0.1852
A (below)		15-Hz Respiration	8			t=0.03004, df=7	-29.08 to 29.83	0.9769
B	PSTN	15-Hz Heart rate	8			t=1.375, df=6	-86.83 to 24.34	0.2181
B (below)		15-Hz Respiration	8			t=1.318, df=6	-9.577 to 31.95	0.2355
C	cCeA	15-Hz Heart rate	6			t=0.8996, df=5	-95.83 to 46.15	0.4095
C (below)		15-Hz Respiration	6			t=0.3073, df=5	-6.635 to 5.218	0.771
D	rCeA	15-Hz Heart rate	9			t=7.648 df=8	-180.6 to -96.93	< 0.0001
D (below)		15-Hz Respiration	9			t=1.939 df=8	-25.16 to 2.174	0.0885
E	SI	15-Hz Heart rate	7			t=2.476 df=6	-144.9 to -0.8638	0.048
E (below)		15-Hz Respiration	7			t=1.657, df=8	-4.214 to 25.71	0.1362
F	ovBST	15-Hz Heart rate	6			t=4.349 df=5	-124.0 to -31.85	0.0074
F (below)		15-Hz Respiration	6			t=0.3636, df=6	-10.90 to 14.70	0.7286
G	VPMpc	15-Hz Heart rate		5		t=0.2133, df=4	-48.59 to 56.68	0.8416
G (below)		15-Hz Respiration		5		t=0.6382, df=4	-9.736 to 15.55	0.5581
H	PSTN	15-Hz Heart rate		5		t=1.195, df=4	-43.24 to 108.6	0.2981
H (below)		15-Hz Respiration		5		t=2.442, df=4	-1.113 to 17.36	0.0711
I	cCeA	15-Hz Heart rate		5		t=0.7042, df=4	-27.55 to 16.40	0.5202
I (below)		15-Hz Respiration		5		t=0.08796, df=4	-24.11 to 22.63	0.9341
J	rCeA	15-Hz Heart rate		7		t=0.4051, df=6	-53.34 to 38.19	0.6995
J (below)		15-Hz Respiration		7		t=0.2187, df=6	-15.34 to 18.36	0.8341
K	SI	15-Hz Heart rate		7		t=2.354, df=4	-42.15 to 3.474	0.0782
K (below)		15-Hz Respiration		7		t=0.6754, df=4	-8.190 to 13.46	0.5364
L	ovBST	15-Hz Heart rate		5		t=2.058, df=4	-58.13 to 8.643	0.1087
L (below)		15-Hz Respiration		5		t=0.1139, df=4	-26.83 to 24.72	0.9148
Figure 4--figure supplement 1
Panel	Fiber site	Test	ChR2	YFP	Test	T	95% CI	P value
A	PBN	Hotplate	6	5	Unpaired t test Welch	t=6.215, df=4.307	-17.40 to -6.859	0.0027
	VPMpc	reactivity	7	5		t=2.354, df=9.230	-3.547 to -0.07695	0.0424
	PST		5	5		t=1.650, df=5.025	-10.90 to 2.369	0.1596
	cCeA		6	5		t=2.763, df=6.212	-7.398 to -0.4799	0.0315
	rCeA		6	5		t=5.001, df=8.003	-19.62 to -7.237	0.0011
	SI		5	5		t=2.120, df=7.070	-7.929 to 0.4251	0.0714
	ovBST		6	4		t=3.574, df=7.910	-7.764 ± 2.173	0.0074
B	PBN	Jumps	6	5		t=1.225, df=5.000	-3.099 to 1.099	0.2752
	VPMpc		7	5		t=0.2325, df=7.774	-0.5125 to 0.6268	0.8222
	PST		5	5		t=0.8220, df=4.222	-8.618 to 4.618	0.455
	cCeA		6	5		t=2.531, df=5.000	-7.727 to 0.06044	0.0525
	rCeA		6	5		t=2.691, df=5.845	-10.98 to -0.4871	0.0369
	SI		5	5		t=1.812, df=4.000	-6.585 to 1.385	0.1443
	ovBST		6	4		t=2.030, df=6.731	-2.718 to 0.2179	0.0835
C	PBN	Jump latency	6	5		t=1.179, df=5.000	-6.463 to 17.41	0.2915
	VPMpc		7	5		t=0.1489, df=9.999	-0.9855 to 1.127	0.8846
	PST		5	5		t=0.8199, df=4.227	-13.66 to 25.46	0.456
	cCeA		6	5		t=1.672, df=5.000	-3.648 to 17.23	0.1553
	rCeA		6	5		t=2.796, df=5.734	1.917 to 31.44	0.0329
	SI		5	5		t=1.785, df=4.000	-5.044 to 23.21	0.1488
	ovBST		6	4		t=1.491, df=5.468	-2.806 to 11.05	0.1912
D	PBN	Tail-flick test	4	4		t=2.928, df=3.129	-13.69 to 0.4113	0.058
	VPMpc		6	5		t=0.4411, df=8.754	-1.525 to 1.029	0.6698
	PST		5	5		t=1.296, df=4.528	-2.139 to 0.7354	0.2571
	cCeA		6	5		t=0.9193, df=7.920	-0.6065 to 0.2612	0.3851
	rCeA		6	5		t=2.595, df=4.838	-0.001014 to 2.684	0.0501
	SI		5	5		t=1.283, df=4.806	-2.174 to 0.7377	0.2577
	ovBST		6	4		t=0.4973, df=5.512	-1.695 to 2.537	0.6382
E	PBN	RTPP DM	6	4		t=4.031, df=8.000	-2.223 to -0.6052	0.0038
F	VPMpc	RTPP DM	8	5		t=2.670, df=10.70	-1.045 to -0.09895	0.0222
G	PST	RTPP DM	9	5		t=1.630, df=10.98	-1.070 to 0.1597	0.1315
H	cCeA	RTPP DM	6	5		t=0.1727, df=6.629	-1.022 to 0.8842	0.868
I	rCeA	RTPP DM	7	5		t=4.152, df=7.323	-2.479 to -0.6901	0.0039
J	SI	RTPP DM	7	5		t=2.698, df=8.674	-1.680 to -0.1428	0.0253
K	ovBST	RTPP DM	7	5		t=0.1988, df=9.471	-0.7844 to 0.9368	0.8466
Figure 6--figure supplement 1
Panel	Fiber site	Test	Chrimson	YFP	Test	F	95% CI	P value	Interaction		Time		Column		Posttest
A	VPMpc+cCeA	Response latency	4	5	Mantel-Cox Logrank test	Chi-squared = 9.030	0.7451 to 31.72	0.0027
		HR vs freezing
B	cCeA	Freezing	5		Ordinary 1-way ANOVA	F (3, 16) = 22.73		<0.0001
					Tukey's	0 vs. 5	-36.20 to -8.563	**
						0 vs. 12	-42.59 to -14.95	***
						0 vs. 20	-52.12 to -24.48	****
						5 vs. 20	-29.74 to -2.103	*
C	rCeA/SI	Freezing	5		Ordinary 1-way ANOVA	F (3, 16) = 15.07		<0.0001
					Tukey's	0 vs. 12	-18.69 to -1.388	*
						0 vs. 20	-26.87 to -9.568	****
						5 vs. 20	-24.77 to -7.468	***
D	VPMpc	Freezing	5		Ordinary 1-way ANOVA	F (3, 16) = 45.42		<0.0001
					Tukey's	0 vs. 5	-49.81 to -17.79	****
						0 vs. 12	-66.06 to -34.04	****
						0 vs. 20	-77.21 to -45.19	****
						5 vs. 12	-32.26 to -0.2422	*
						5 vs. 20	-43.41 to -11.39	***
E	cCeA+rCeA	Freezing	5	4	2-way RM ANOVA				F (13, 91) = 11.94	P<0.0001	F (13, 91) = 13.28	P<0.0001	F (1, 7) = 41.27	P=0.0004	Sidak's
					Sidak's	Row 3	19.79 to 56.53	<0.0001
						Row 6	25.86 to 62.59	<0.0001
						Row 9	31.72 to 68.45	<0.0001
						Row 12	36.45 to 73.18	<0.0001
F	rCeA+VPMpc	Freezing	5	4	2-way RM ANOVA				F (13, 91) = 25.17	P<0.0001	F (13, 91) = 26.58	P<0.0001	F (1, 7) = 173.5	P<0.0001	Sidak's
					Sidak's	Row 3	54.17 to 87.43	<0.0001
						Row 4	4.267 to 37.52	**
						Row 6	51.15 to 84.41	<0.0001
						Row 7	5.519 to 38.77	**
						Row 8	4.858 to 38.11	**
						Row 9	52.15 to 85.41	<0.0001
						Row 10	7.978 to 41.23	***
						Row 11	11.42 to 44.67	<0.0001
						Row 12	59.36 to 92.62	<0.0001
						Row 13	13.88 to 47.13	<0.0001
						Row 14	12.71 to 45.97	<0.0001
G	cCeA+VPMpc	Freezing	5	4	2-way RM ANOVA				F (13, 91) = 35.91	P<0.0001	F (13, 91) = 40.18	P<0.0001	F (1, 7) = 118.3	P<0.0001	Sidak's
					Sidak's	Row 3	73.34 to 112.9	<0.0001
						Row 4	8.816 to 48.39	***
						Row 5	1.470 to 41.04	*
						Row 6	68.26 to 107.8	<0.0001
						Row 7	7.561 to 47.13	**
						Row 8	7.087 to 46.66	**
						Row 9	68.49 to 108.1	<0.0001
						Row 10	9.425 to 49.00	***
						Row 11	4.179 to 43.75	**
						Row 12	74.16 to 113.7	<0.0001
						Row 14	0.9245 to 40.50	*
H	Baseline	Freezing during stim	5		Ordinary 1-way ANOVA	F (3, 16) = 72.18		<0.0001
	cCeA+rCeA		5		Tukey's	BL vs. cCeA+rCeA	-65.60 to -27.90	<0.0001
	rCeA+VPMpc		5			BL vs. rCeA+VPMpc	-90.70 to -53.00	<0.0001
	cCeA+VPmpc		5			BL vs. cCeA+VPMpc	-110.6 to -72.85	<0.0001
						cCeArCeA vs. rCeAVPMpc	-43.95 to -6.247	**
						cCeArCeA vs. cCeAVPMpc	-63.80 to -26.10	<0.0001
						rCeAVPMpc vs. cCeAVPMpc	-38.70 to -1.002	*
I	Baseline	Freezing post stim	5		Ordinary 1-way ANOVA	F (3, 16) = 14.04		<0.0001
	cCeA+rCeA		5		Tukey's	BL vs. rCeA+VPMpc	-38.14 to -11.34	***
	rCeA+VPMpc		5			BL vs. cCeA+VPMpc	-38.79 to -11.98	***
	cCeA+VPmpc		5			cCeArCeA vs. rCeAVPMpc	-29.03 to -2.226	*
						cCeArCeA vs. cCeAVPMpc	-29.67 to -2.869	*
K	Multi-area Fos post dual activation	PBN	3	6	Unpaired t test Welch	t=9.489, df=8.504	17.01 to 27.79	<0.0001
		VPMpc	3	6		t=3.308, df=4.392	1.584 to 15.13	0.0258
		PSTN	3	6		t=8.813, df=5.887	19.87 to 35.25	0.0001
		cCeA	3	6		t=3.779, df=4.103	5.001 to 31.70	0.0186
		rCeA	3	6		t=5.790, df=4.118	13.54 to 37.94	0.004
		SI	3	6		t=4.056, df=4.873	1.680 to 7.620	0.0103
		ovBST	3	6		t=2.836, df=4.451	0.5451 to 17.93	0.0416
		alBST	3	6		t=2.531, df=8.895	0.7542 to 13.65	0.0324
L	VPMpc+cCeA	CGRP Fos	5	4	Unpaired t test Welch	t=4.256, df=4.403	2.569 to 11.30	0.0106
Figure 7--figure supplement 1
Panel	Fiber site	Test	JAWS	YFP	Test	T	95% CI	P value
B	PBN	Hotplate reactivity	8	5	Unpaired t test Welch	t=0.06823, df=7.277	-2.004 to 2.124	0.9474
C	PBN	Jumps	8	5	Unpaired t test Welch	t=2.026, df=9.019	-4.180 to 0.2299	0.0734
D	Multi	Hotplate reactivity	8x3	12	Ordinary 1-way ANOVA	F (3, 32) = 2.458		0.0808
E	Multi	Jumps	8x3	12	Ordinary 1-way ANOVA	F (3, 32) = 1.257		0.3057
F	PBN	RTPP	6	5	Unpaired t test Welch	t=0.4815, df=7.218	-19.36 to 29.34	0.6444
G	VPMpc	RTPP	8	12		t=0.8059, df=12.17	-20.12 to 9.244	0.4358
H	CeA	RTPP	8	12		t=0.6183, df=17.72	-12.96 to 7.069	0.5442
I	SI	RTPP	8	12		t=0.2346, df=14.64	-13.62 to 10.93	0.8178
