# Supplementary figures and images for: Dissociable control of unconditioned responses and associative fear learning by parabrachial CGRP neurons
Source: eLife journal article supplement (doi:10.7554/elife.59799), 2020-08-28

Figure 1—figure supplement 1

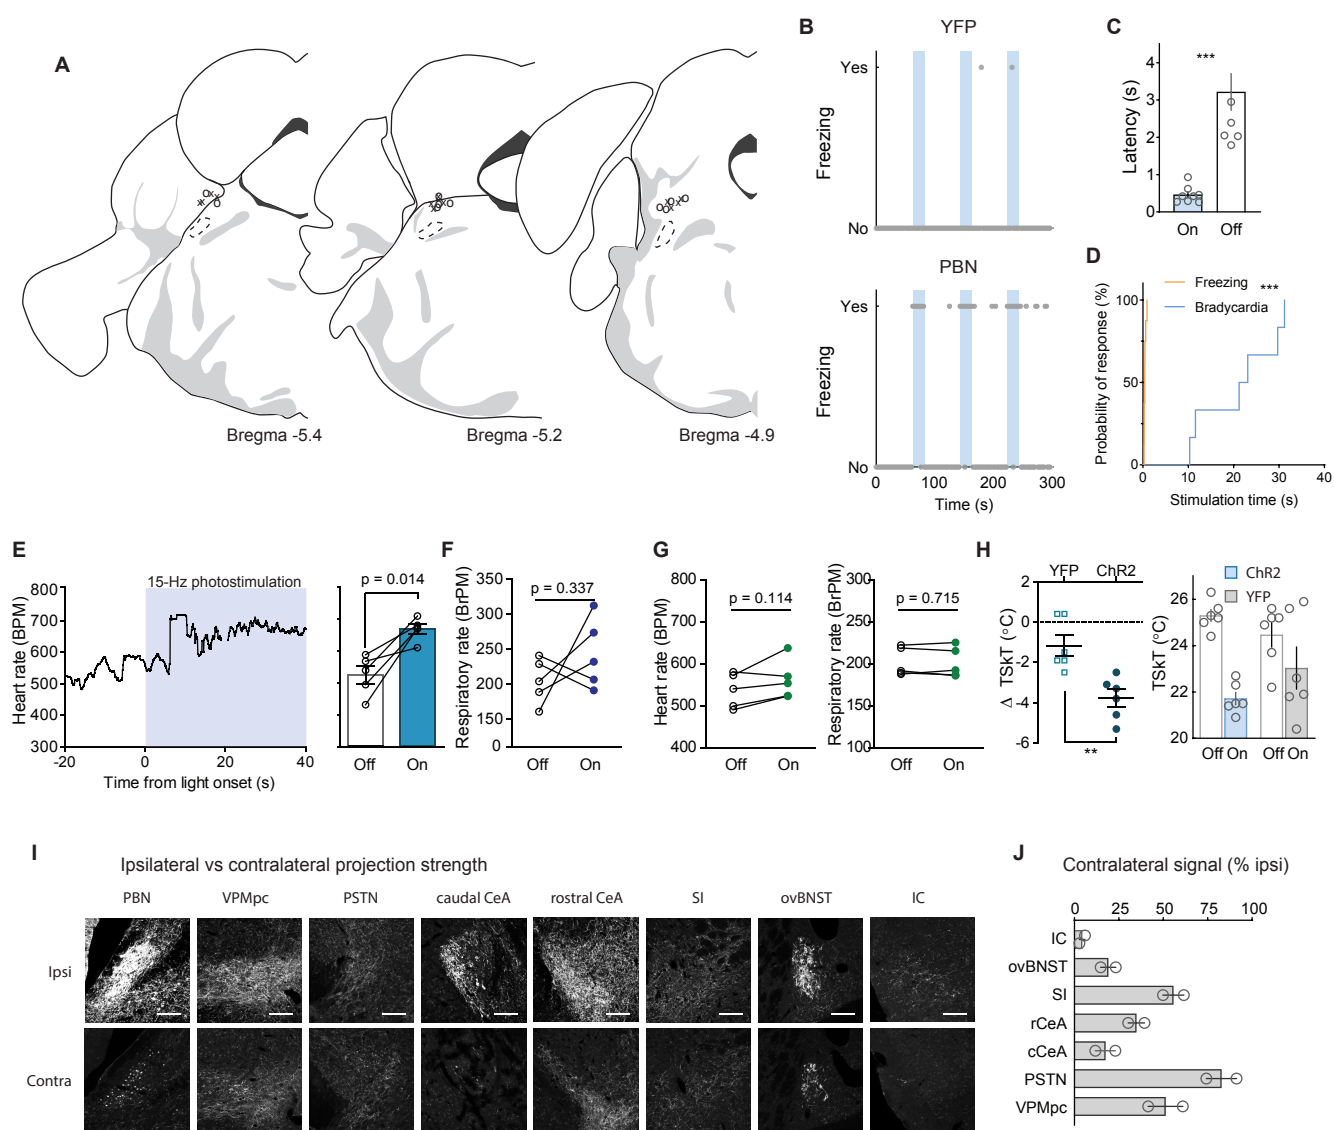

Supplement: supp [file elife_poa_e59799_Figure_1_figure_supplement_1.pdf › elife_poa_e59799_Figure_1_figure_supplement_1.pdf]

Figure 2—figure supplement 1

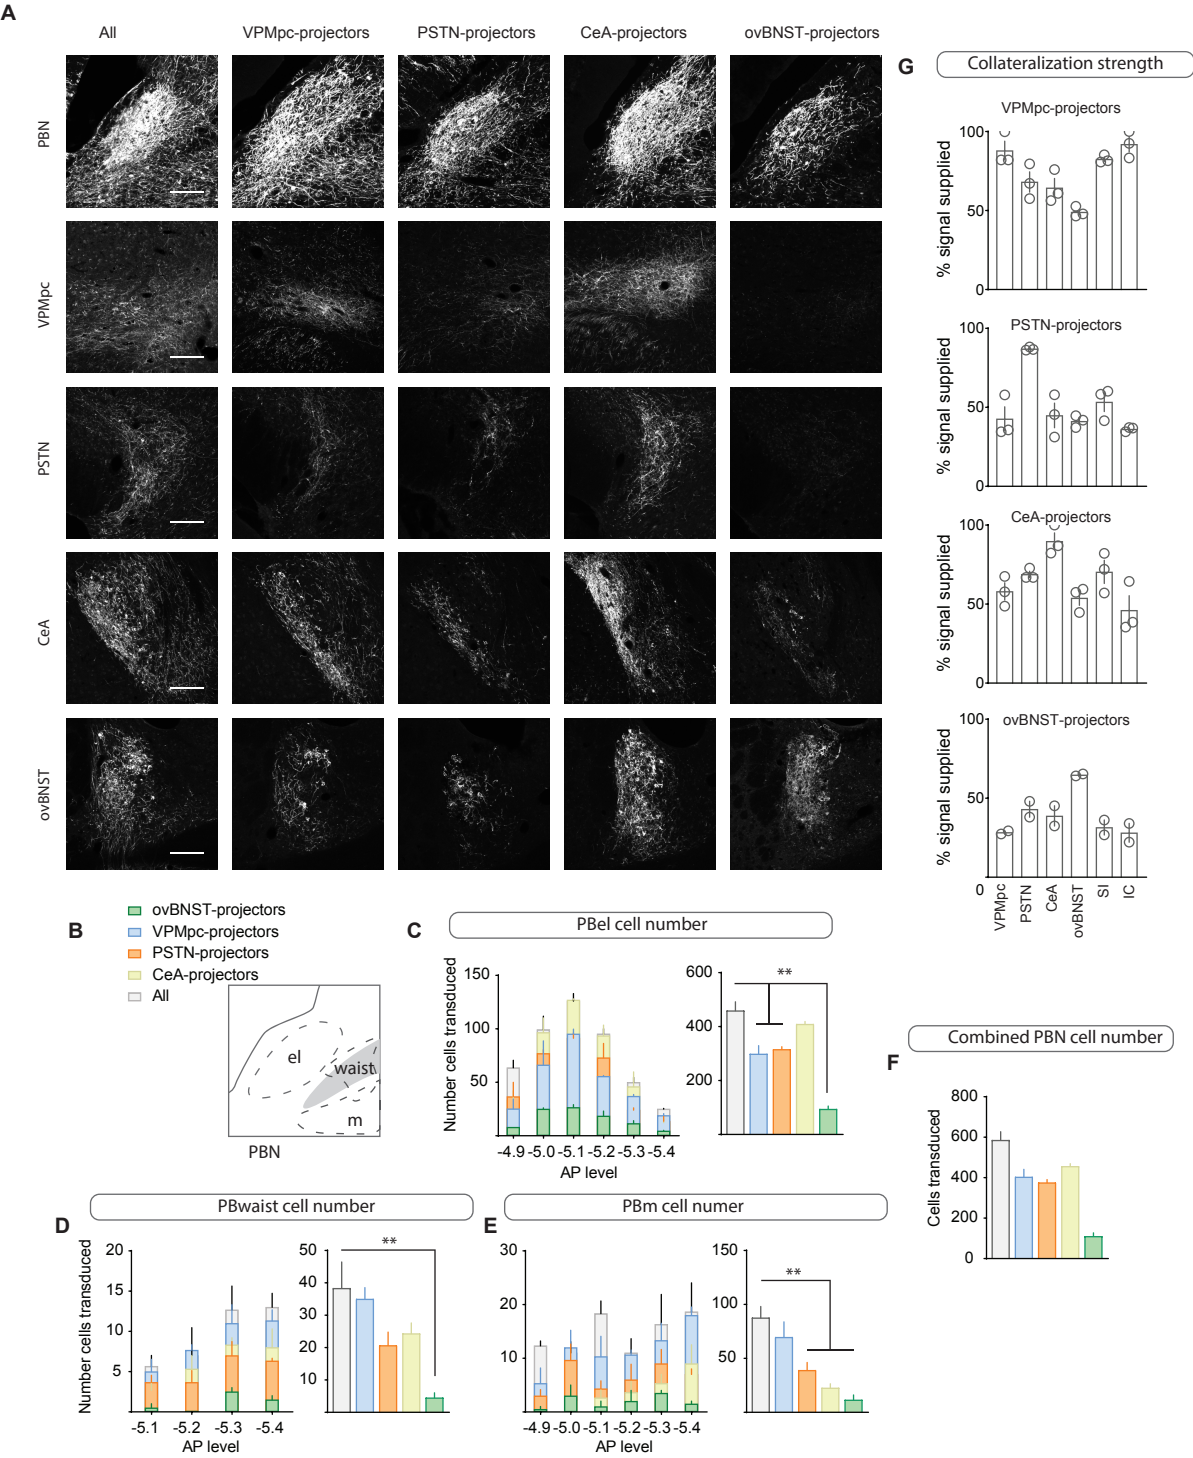

Supplement: supp [file elife_poa_e59799_Figure_2_figure_supplement_1.pdf › elife_poa_e59799_Figure_2_figure_supplement_1.pdf]

Figure 3—figure supplement 1

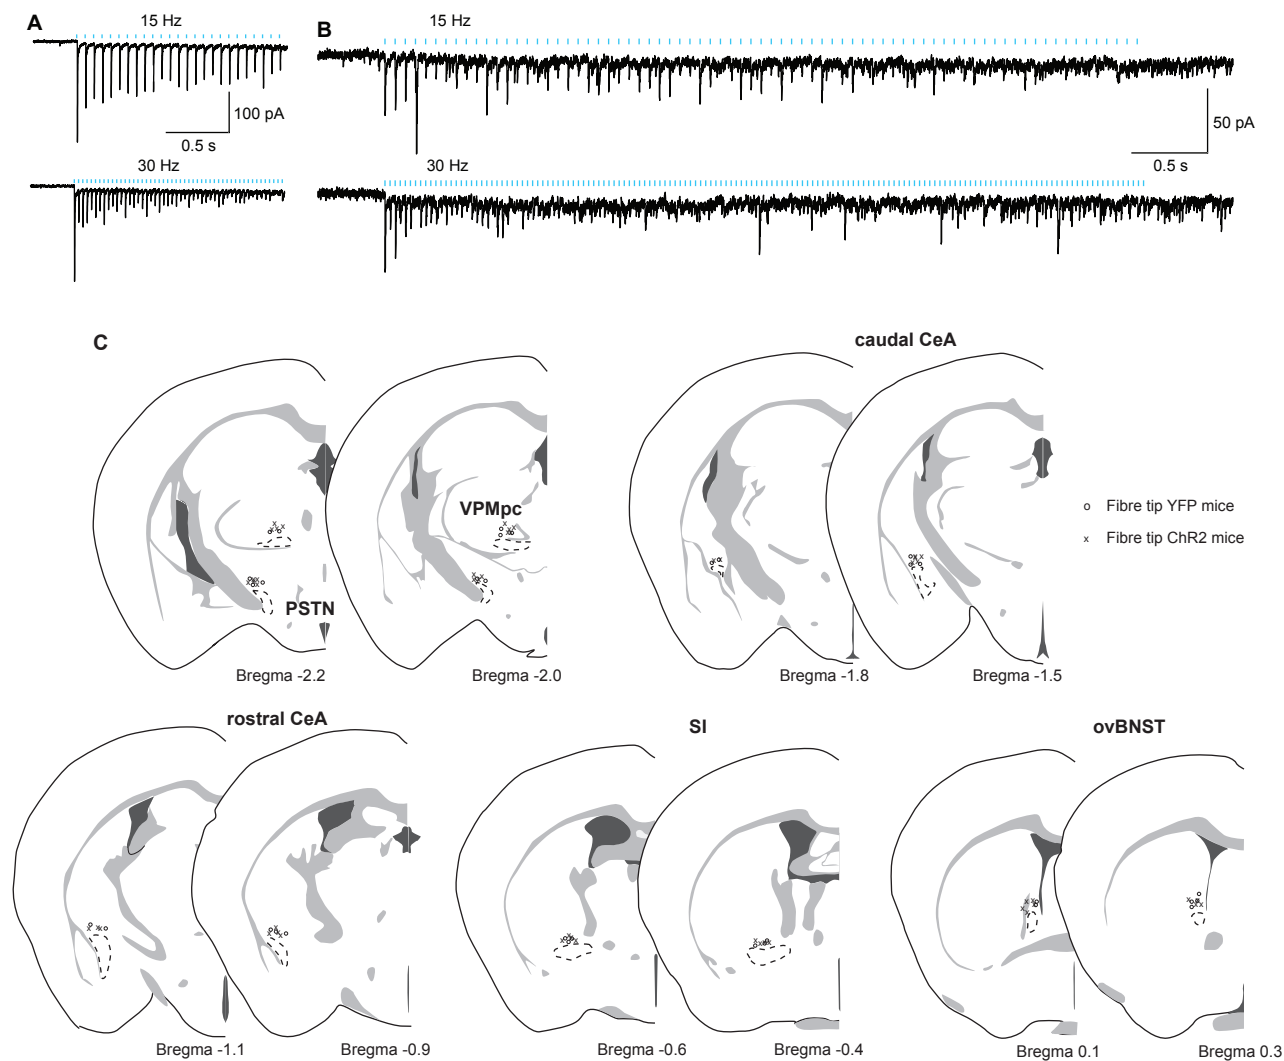

Supplement: supp [file elife_poa_e59799_Figure_3_figure_supplement_1.pdf › elife_poa_e59799_Figure_3_figure_supplement_1.pdf]

Figure 3—figure supplement 2

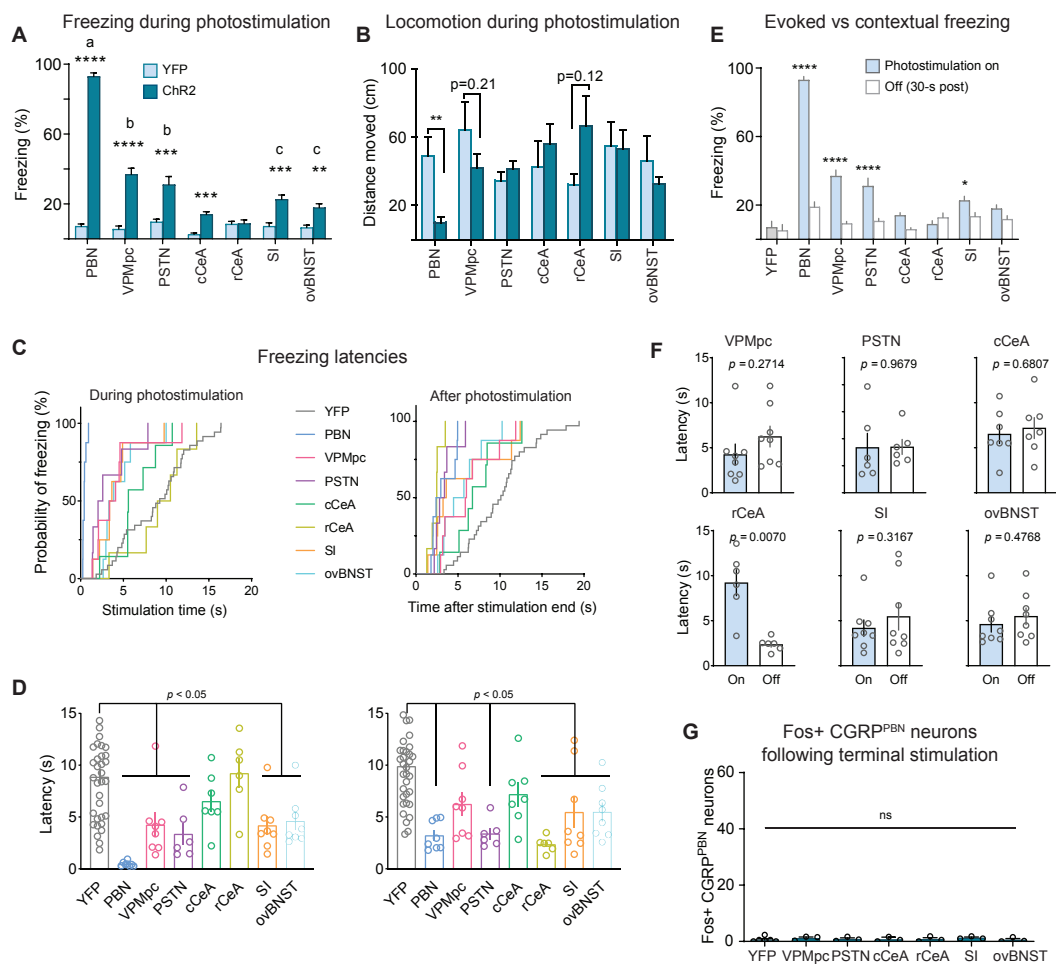

Supplement: supp [file elife_poa_e59799_Figure_3_figure_supplement_2.pdf › elife_poa_e59799_Figure_3_figure_supplement_2.pdf]

Figure 3—figure supplement 3

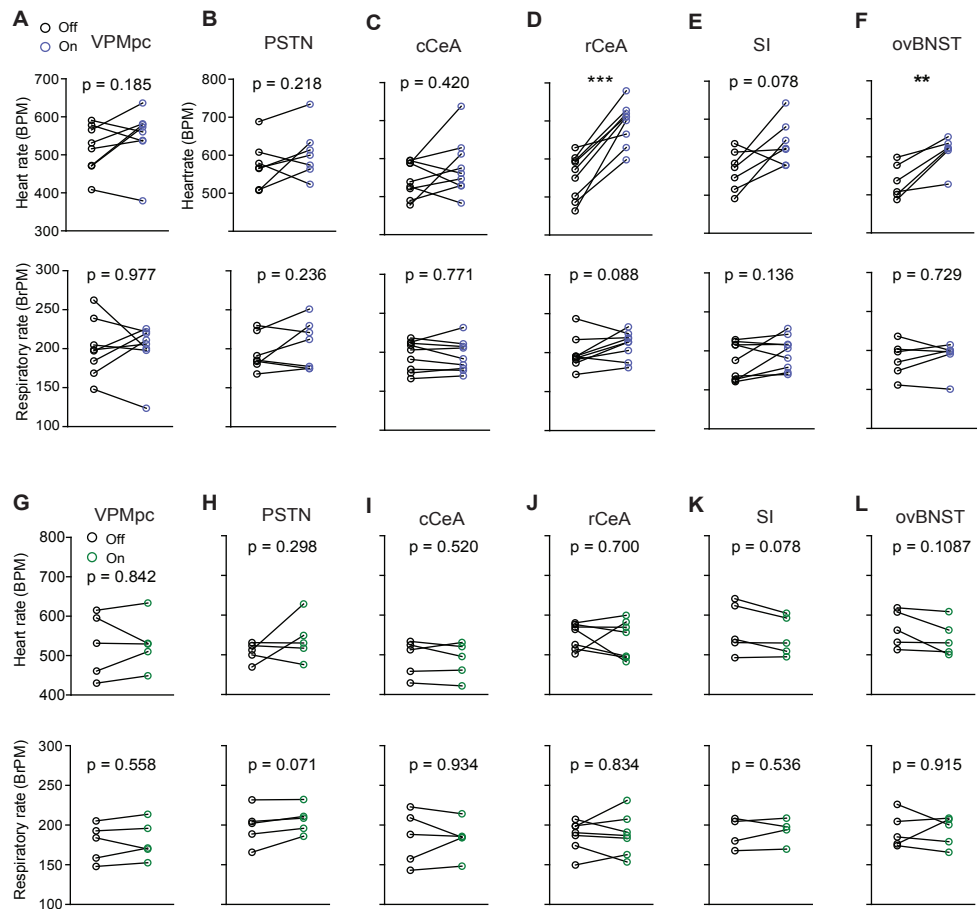

Supplement: supp [file elife_poa_e59799_Figure_3_figure_supplement_3.pdf › elife_poa_e59799_Figure_3_figure_supplement_3.pdf]

Figure 4—figure supplement 1

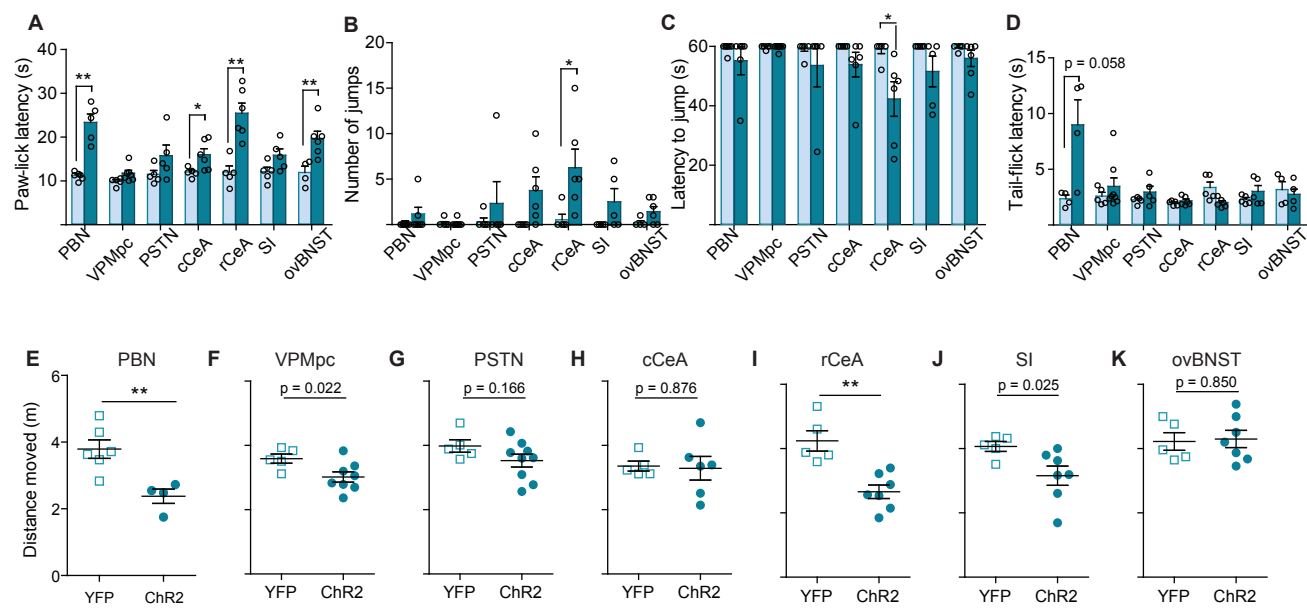

Supplement: supp [file elife_poa_e59799_Figure_4_figure_supplement_1.pdf › elife_poa_e59799_Figure_4_figure_supplement_1.pdf]

Figure 6—figure supplement 1

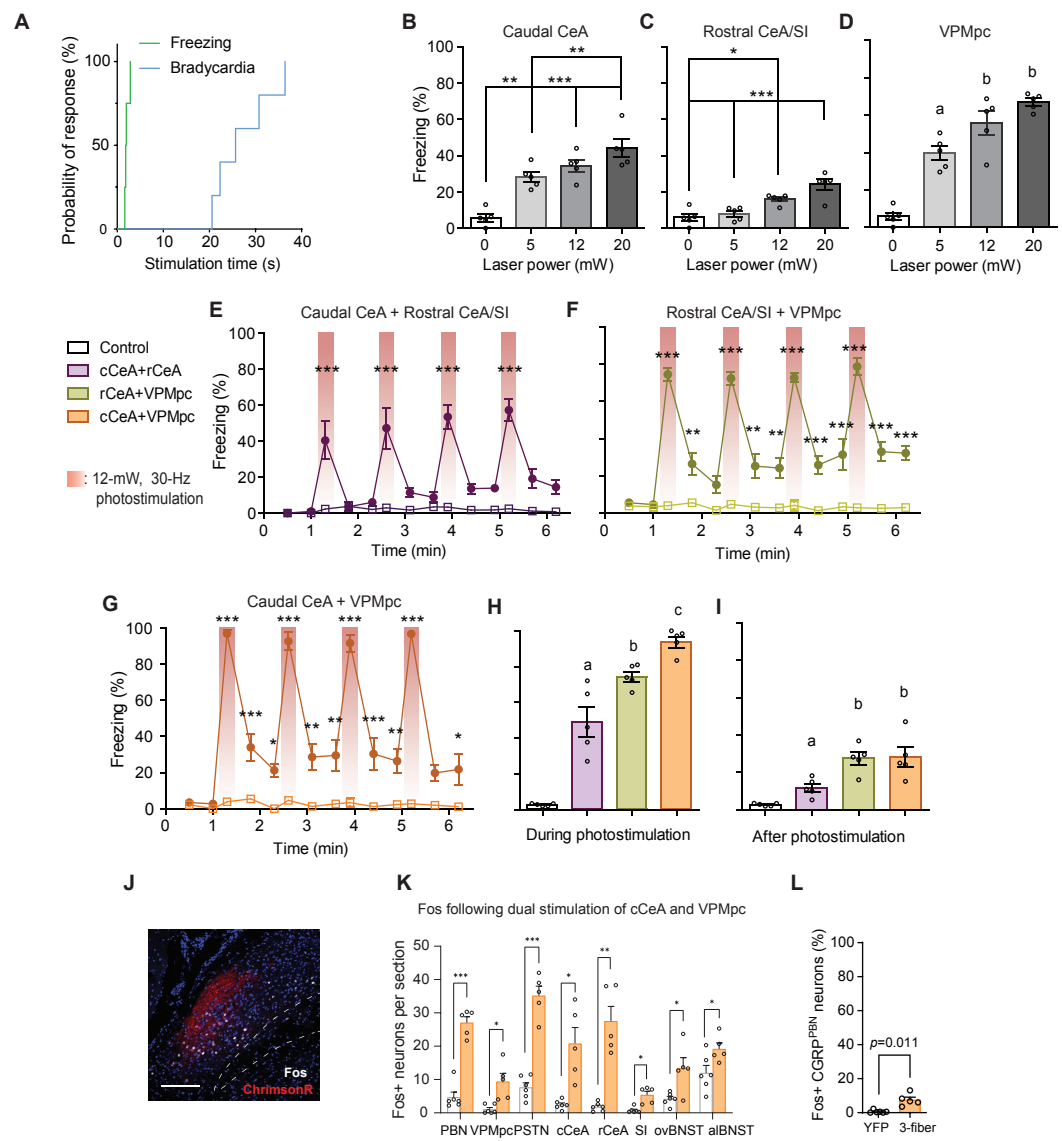

Supplement: supp [file elife_poa_e59799_Figure_6_figure_supplement_1.pdf › elife_poa_e59799_Figure_6_figure_supplement_1.pdf]

Figure 7—figure supplement 1

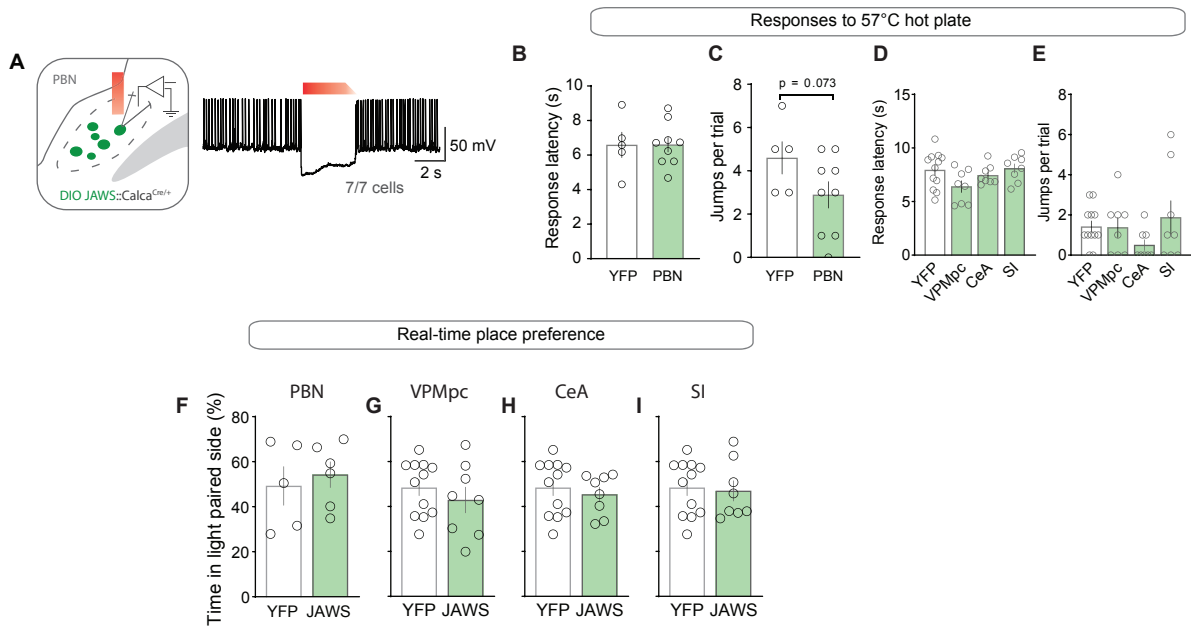

Supplement: supp [file elife_poa_e59799_Figure_7_figure_supplement_1.pdf › elife_poa_e59799_Figure_7_figure_supplement_1.pdf]
